# Supplementary material for: Technical note: Identification of chemical composition and source of fluorescent components in atmospheric water-soluble brown carbon by excitation-emission matrix with parallel factor analysis: Potential limitation and application
Source: Copernicus journal article supplement (doi:10.5194/acp-2022-676), 2022-10-07
Supplement: Supplementary file [file acp-2022-676-AC1-supplement.pdf]

## **Response to acp-2022-676-RC1**

Comment on acp-2022-676

Anonymous Referee #1

This manuscript investigated the EEM spectra of different types of strong light-absorbing organic compounds and water-soluble organic matter in different aerosol samples. The motivation is to broaden the application of the EEM-PARAFAC method to study atmospheric BrC. This manuscript is thoughtful and well-written. Below are some issues and comments for the authors to consider.

Re: Thanks for your valuable criticisms and comments, which are of great help for improving the quality of the manuscript. Based on your comments, we have revised the manuscript and provided a point-by-point response to all the comments. The detailed replies are as follows.

Introduction: some more description of WSOC should be involved in the introduction.

Re: Thanks. This is a good comment. In the present manuscript, we have added some descriptions of atmospheric WSOC in the introduction. Please refer to Lines 49-54.

Line 83: In the water environment, we usually call WSOC as DOM.

Re: Thanks. We have corrected it to “DOM” in the present manuscript. Please refer to Line 87.
